# Supplementary material for: Orbital angular momentum processing via diffractive networks for terahertz mode-division-multiplexed wireless links
Source: Research Square preprint supplement (doi:10.21203/rs.3.rs-7986423/v1), 2025-11-18
Supplement: Supplementary file 1 [file e20bbbc9aebeaa9d215ca2c1.docx]

Supplementary Information

Orbital angular momentum processing via diffractive networks for terahertz mode-division-multiplexed wireless links

Ming-Zhe Chong, Shao-Xin Huang, Zong-Kun Zhang, Ka Fai Chan, Peijie Feng, Kam Man Shum, Kwun Wing Cheung, Geng-Bo Wu, Chi Hou Chan*, and Ming-Yao Xia*

**Note I. Ground truth of different output OAM modes**

The ground truth of output OAM modes with various TC values, with the range of *l* = {-10, -8, -6, -5, -4, -3, -2, -1, 0, 1, 2, 3, 4, 5, 6, 8, 10}, is shown in **Figure S1**. Specifically, these output OAM beams are the Laguerre-Gaussian (LG) beams with only the angular index *l* (i.e., the radial index is 0). Thus, these LG beams carry various modes of OAM. The field distributions are mathematically described as:

(S-1)

where and denote the absolute value and the factorial operations, *l* is the angular index (i.e., TC value), (*ρ*, *θ*) represents the location of the polar coordinate system, and *ω*0 = 6 mm denotes the beam waist radius of the LG beam.


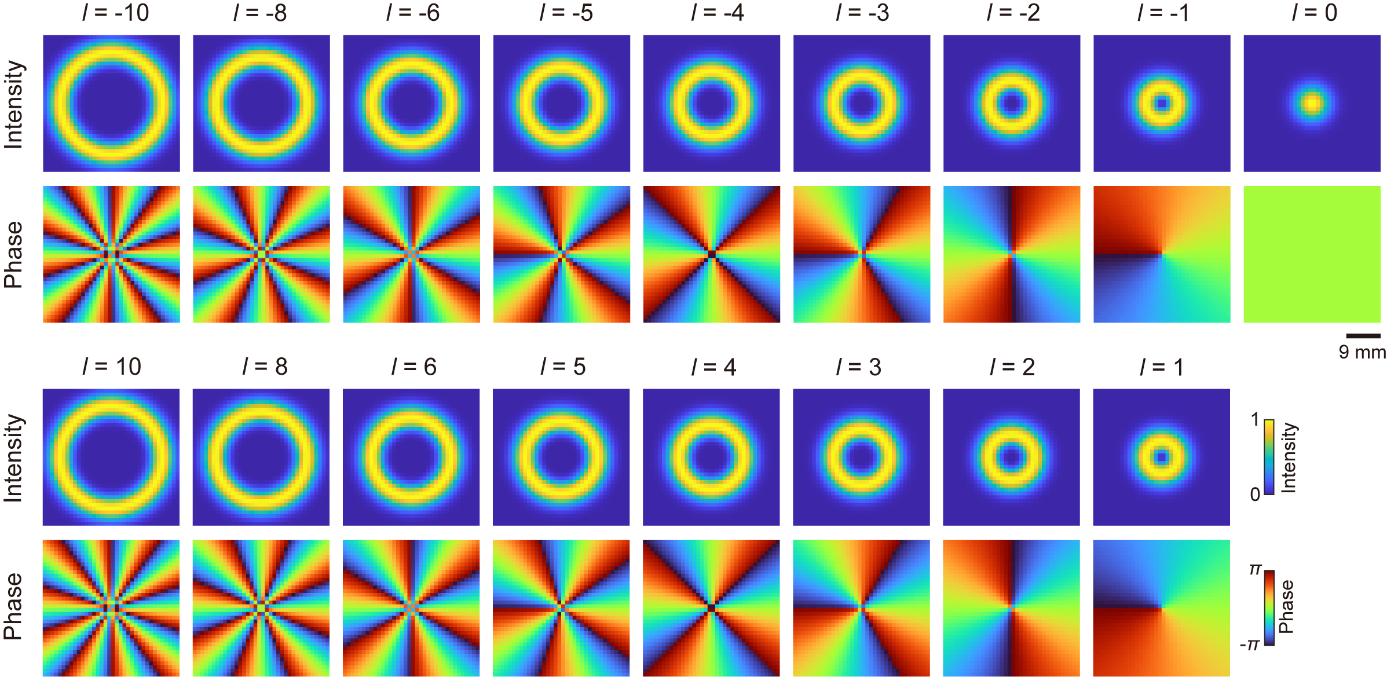


**Figure S1.** Ground truth of output OAM modes with various TC values used in this work, including both intensity and phase.

**Note II. The OAM transformer for mode division**

Here, we demonstrate the design of another OAM transformer that performs OAM division, as shown in **Figure S2**, to validate the versatility of the OAM processors. A set of input modes *lin* = {-10, -8, -6, -4, -2, 0, 2, 4, 6, 8, 10} is transformed to another set of output modes *lout* = {-5, -4, -3, -2, -1, 0, 1, 2, 3, 4, 5}, satisfying the division relation: *lout* = *lin* / 2 (schematically shown in **Figure S2a**). The output modes possess high efficiency and PCC values, indicating good mode transformation performance. The optimized phases of the diffractive layers are depicted in **Figure S2b**. The phase profiles of the OAM phase modulators with various TC values are shown in **Figure S2c**, which can produce the input OAM beams of this OAM transformer, as shown in **Figure S2d**. The intensity and phase distributions clearly show the features of OAM modes. After passing through the diffractive layers, these input OAM beams form the converted OAM modes on the FoV of the output plane (shown in **Figure S2e**). The features of output OAM modes are clearly observed, with a high average PCC value of 0.969 between the output modes and their ground truths.


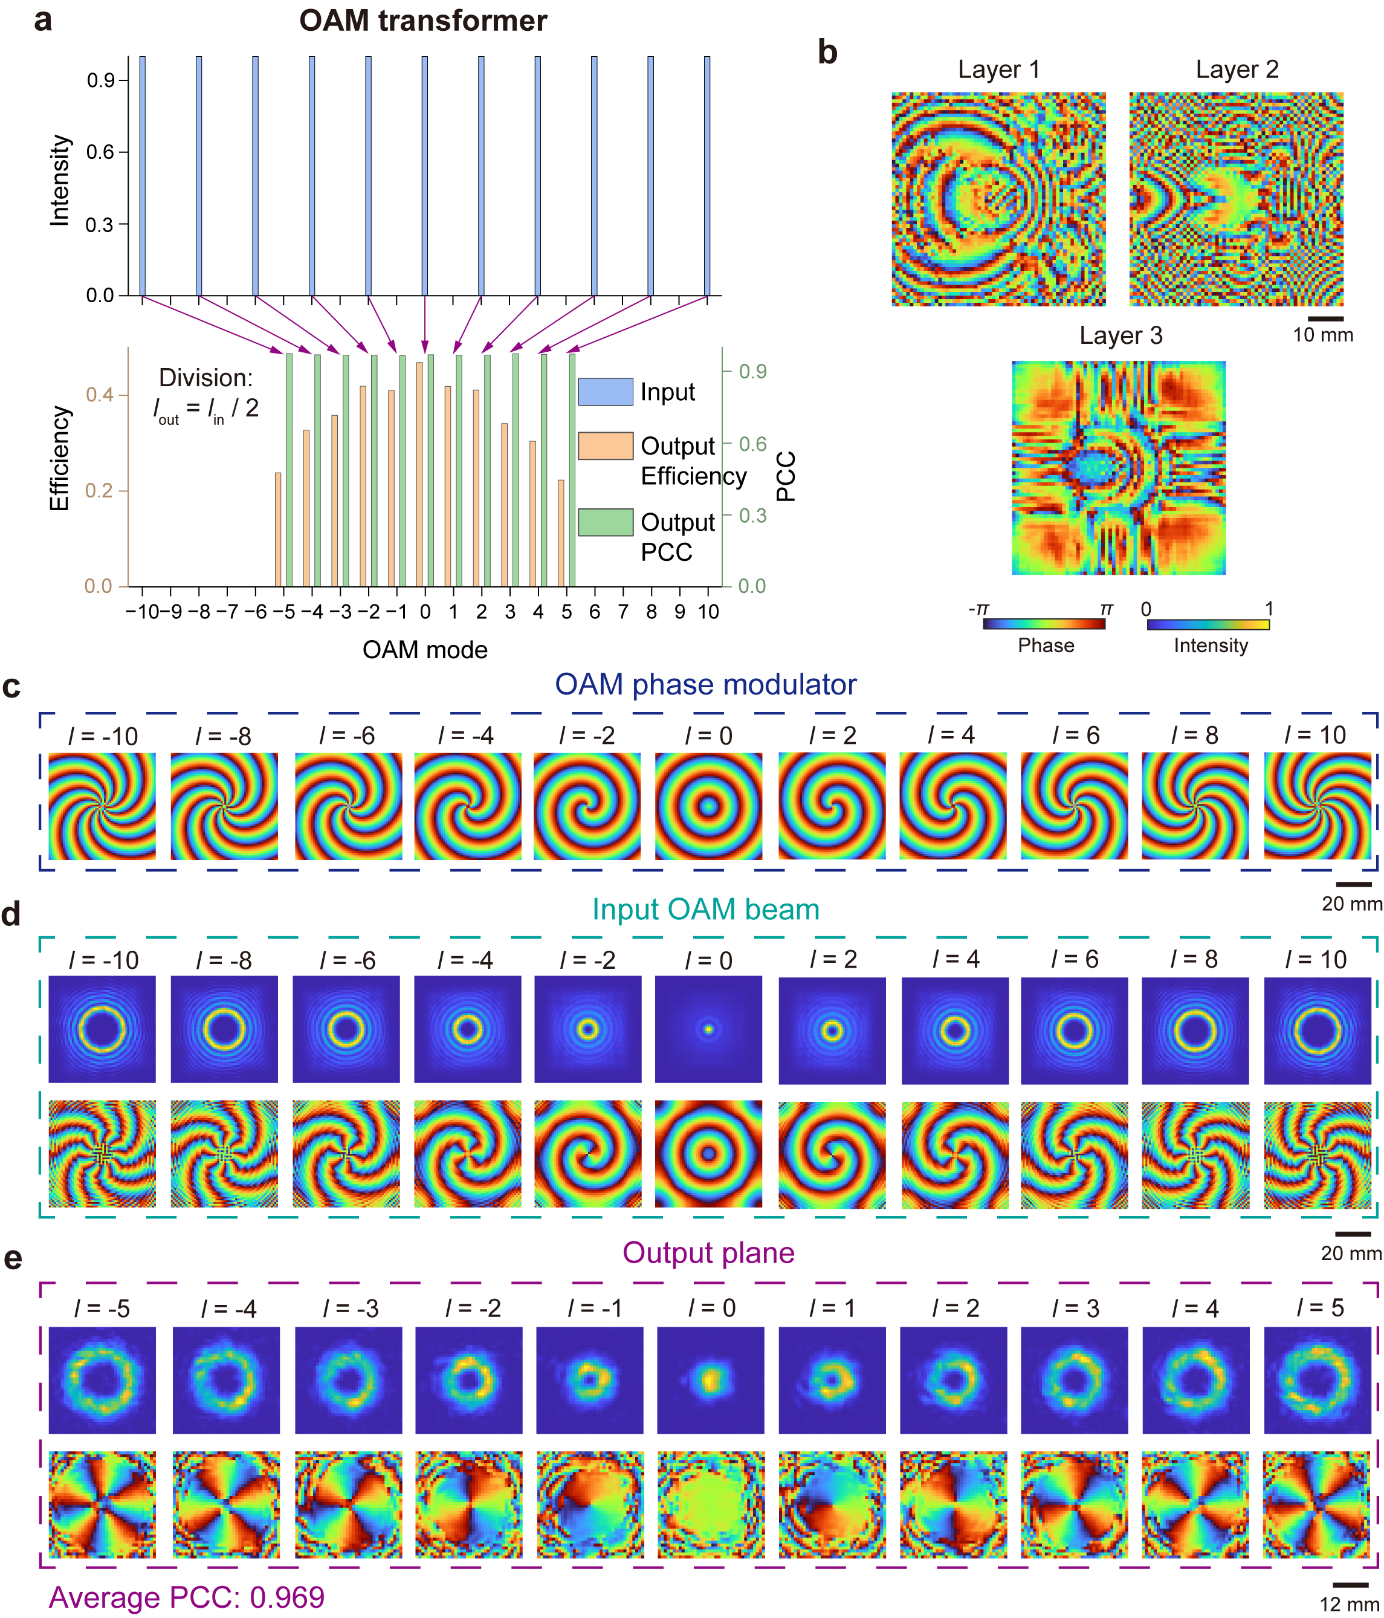


**Figure S2.** Simulated results of another OAM transformer for mode division. **a** Numerical analysis of the simulated OAM transformer for mode division, characterized by efficiency and PCC value. **b** Phase profiles of the 3 diffractive layers. **c** Phase profiles of the OAM phase modulators to generate input OAM beams with different TC. **d, e** Field distributions of different input (**d**) and output (**e**) OAM beams, including intensity (the 1st row) and phase (the 2nd row).
